# Supplementary material for: Identification of a circadian-based prognostic signature predicting cancer-associated fibroblasts infiltration and immunotherapy response in bladder cancer
Source: publisher site journal article supplement (doi:10.18632/aging.206088), 2024-08-30
Supplement: Supplementary file [file aging-v16-206088-supplementary-material-SD1.pdf]

**SUPPLEMENTARY FIGURES**

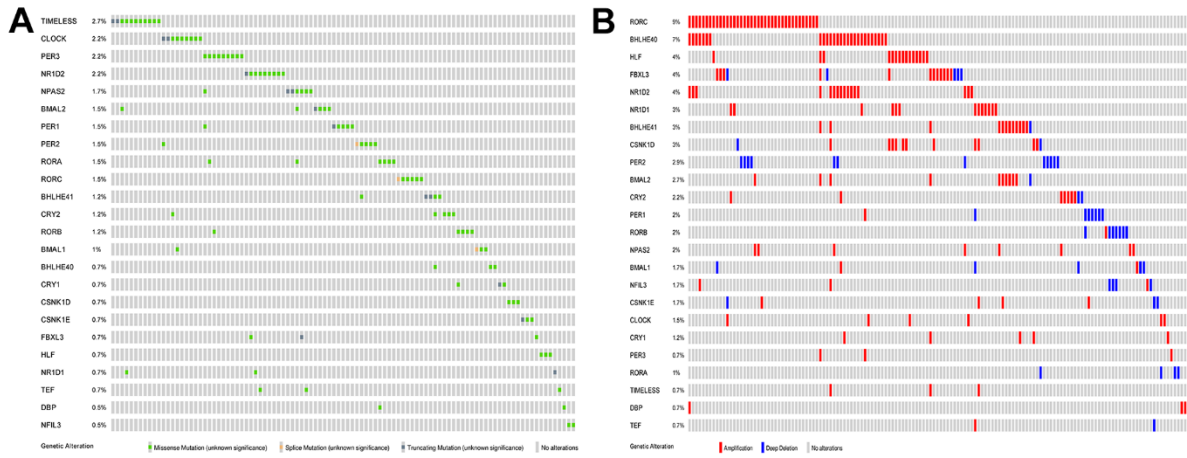

**Supplementary Figure 1. Genetic alterations of the TCGA-BLCA.** (A) Genetic mutations and (B) the copy number variation (CNV) of the 24 CCRGs were analyzed through the cBioPortal websites.

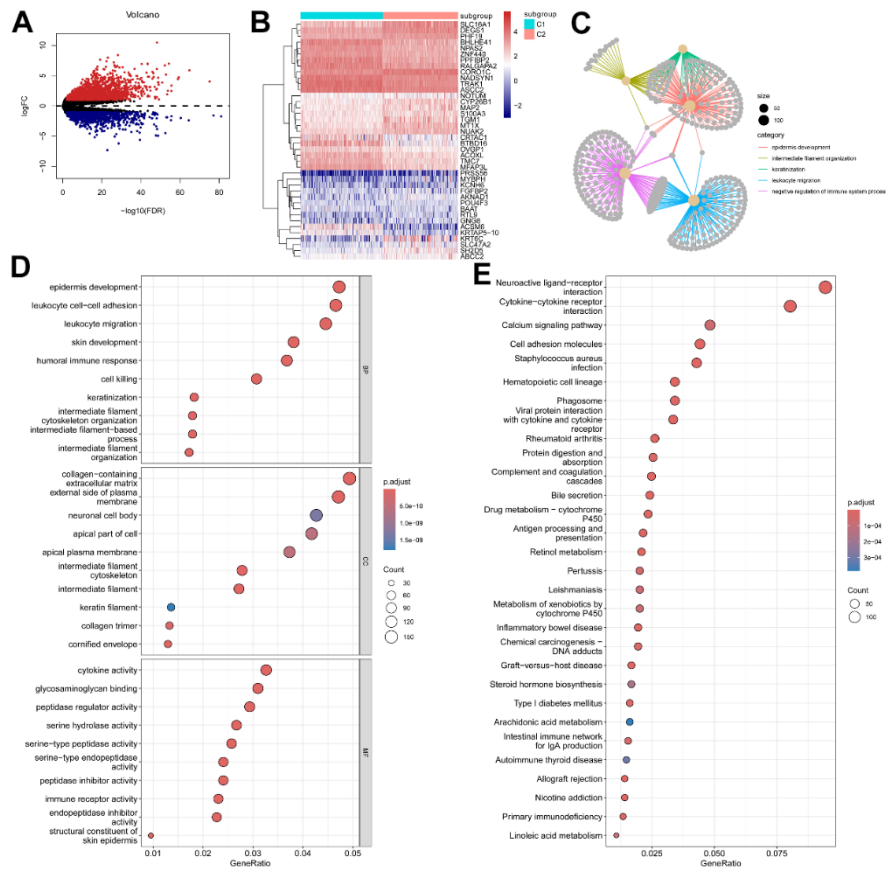

**Supplementary Figure 2. DEGs between the circadian rhythm-based subgroups.** (A) Volcano plot of the DEGs between the C1 and C2 circadian-based clusters. (B) Heatmap plot of the top 40 DEGs. (C) Enrich-plot and (D) bubble charts of the GO enrichment terms of the DEGs. (E) Bubble charts of the KEGG enrichment terms.

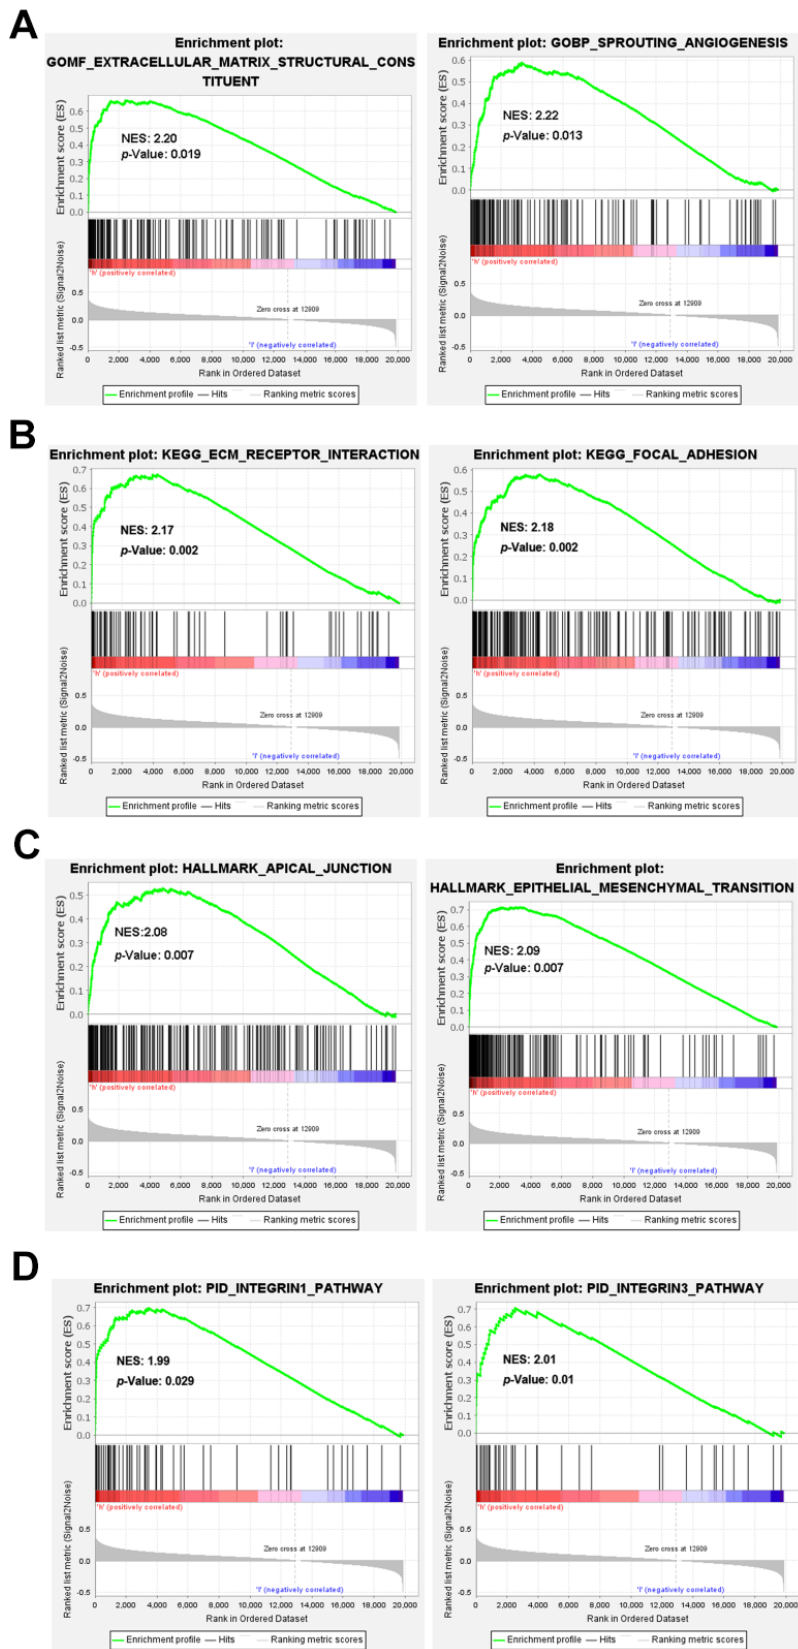

**Supplementary Figure 3. GSEA enrichment between high- and low-risk groups.** GSEA enrichment based on (A) the GO, (B) KEGG, (C) HALLMARK, and (D) the PID (pathway interaction database) gene sets.

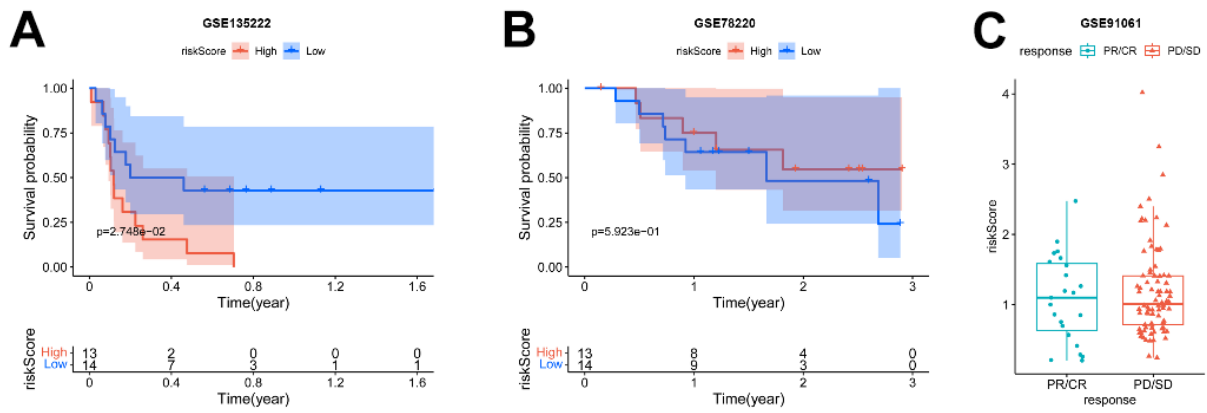

**Supplementary Figure 4. Different immunotherapy response between high- and low-risk groups.** Kaplan-Meier curve of the high- and low-risk patients in tumor immunotherapy cohorts of (A) non-small cell lung carcinoma (GSE135222), and (B) melanoma (GSE78220). (C) Relationship of risk score with immunotherapy response in melanoma cohort GSE91061.

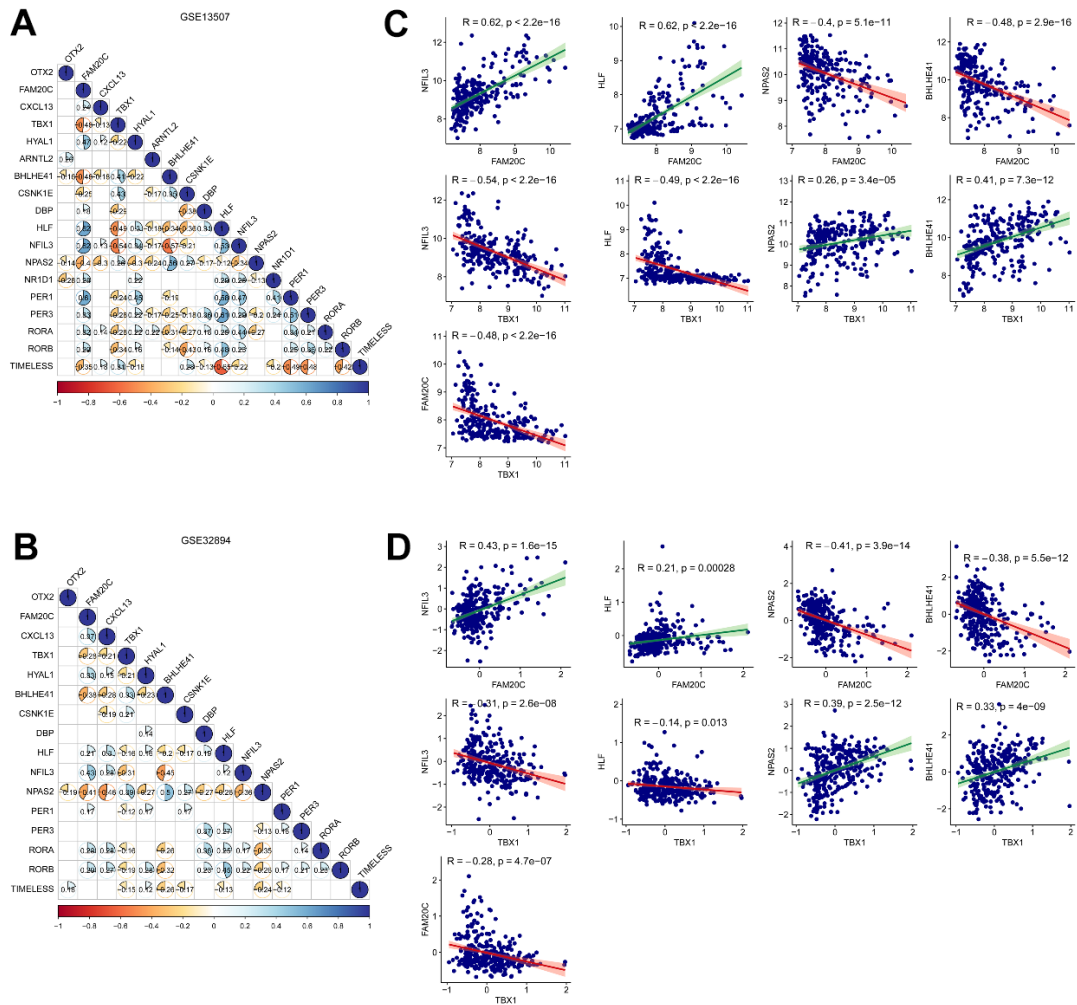

**Supplementary Figure 5. Correlated expression of the risk genes and the CCRDs.** (A, B) Corrplot of the correlated expression of the risk genes with the CCRGs in GSE13507 and GSE32894 datasets. (C, D) Correlation of the indicative genes in GSE13507 and GSE32894 datasets. Method = "Pearson".
